# Supplementary material for: Chrysanthemum flower-like NiCo2O4–nitrogen doped graphene oxide composite: an efficient electrocatalyst for lithium–oxygen and zinc–air batteries
Source: Royal Society of Chemistry journal article supplement (doi:10.1039/c7cc03826g), 2017-01-01
Supplement: c7cc03826g1.pdf [file c7cc03826g1.pdf]

*Electronic Supplementary Information (ESI)*

Chrysanthemum flower like NiCo<sub>2</sub>O<sub>4</sub>-nitrogen doped graphene oxide  
composite: An efficient electrocatalyst for Lithium-oxygen and Zinc-air  
batteries

*Prabu Moni<sup>ab</sup>, Suyeon Hyun<sup>a</sup>, Ahilan Vignesh<sup>a</sup> and Sangaraju Shanmugam<sup>\*a</sup>*

<sup>a</sup> Department of Energy Systems Engineering, Daegu Gyeongbuk Institute of Science and  
Technology (DGIST), 50-1 Sang-Ri, Hyeonpung-Myeon, Dalseong-gun, Daegu 42988,  
Republic of Korea

<sup>b</sup> CSIR-Central Electrochemical Research Institute-Madras Unit, CSIR Madras Complex,  
Taramani, Chennai 600113, India

\*E-mail: [sangarajus@dgist.ac.kr](mailto:sangarajus@dgist.ac.kr)

Tel.: +82-53-785-6413; fax: +82-53-785-6409

## EXPERIMENTAL METHODS

### Synthesis of active catalyst

The Chrysanthemum flower-like morphology consists of  $\text{NiCo}_2\text{O}_4$  (NCO) incorporated nitrogen doped graphene (N-rGO) composite material was prepared by solvothermal method followed by heat treatment. Graphene oxide (GO) was prepared from graphite flakes using a modified Hummers' method.<sup>1</sup> In a typical synthesis, stoichiometric amounts of nickel acetate, cobalt acetate, ammonium hydroxide, graphene oxide (GO) and ethanol were mixed and refluxed at 80 °C for 10 h, then transferred into an autoclave which was heated at 150 °C for 6 h. The resulting product was separated by centrifugation, washed with deionized water, dried at 70 °C for overnight, and then the product was further calcinated in air at 250 °C for 12 h. Likewise bare NCO nanoparticles prepared without both GO and ammonium hydroxide and N-rGO prepared without metal oxide precursors.<sup>2</sup>

### Materials Characterization

The phase purity of the prepared sample was tested by X-ray diffraction (XRD) measurements using a X-ray diffractometer (Rigaku, MiniFlex 600). The Chrysanthemum flower morphology was identified by using a field emission-scanning electron microscope (FE-SEM, Hitachi). To distinguish the NCO and N-rGO of the flower like NCO/N-rGO morphology, a field emission transmission electron microscope (FE-TEM, Hitachi) with elemental mapping was carried out. The nitrogen content in flower like NCO/N-rGO sample was confirmed by elemental analysis (CHNS-VarioMICRICube). The Brunauer–Emmett–Teller (BET) surface area of the flower morphology was tested by a Micromeritics Tristar ASAP 2020 analyzer.

### Electrochemical Characterization

The bi-functional (oxygen reduction and evolution) activity of the samples were tested using a three-electrode setup with computer-controlled potentiostat (Biologic) via rotating disk electrode linear sweep voltammetry (LSV) and cyclic voltammetry (CV), in alkaline medium (0.1 M KOH ) electrolyte under oxygen saturated condition (before  $\text{N}_2$  saturated electrolyte for background correction with the same condition). The catalyst ink was prepared by 2 mg catalyst was ultrasonically dispersed into a solution containing 3  $\mu\text{L}$  of Nafion, 24  $\mu\text{L}$  of deionized water, and 100  $\mu\text{L}$ . 4  $\mu\text{L}$  of catalyst ink was dropped on the glassy carbon disk surface (working electrode) and dried at room temperature. A platinum wire and saturated Calomel electrode served as the counter and reference electrodes, respectively.

### Construction and characterization of zinc-air battery

For testing the zinc-air battery a split cell (EQ-STC-MTI-Korea) packed with a Whatman glass microfiber separator saturated with the 6M KOH aqueous solution sandwiched between a polished zinc anode (diameter of 1.54 cm) and a catalyst-coated gas diffusion layer (GDL, the diameter of 1.78 cm). The cathode catalyst ink was prepared by ultrasonic dispersion of 7 mg of as-synthesized flowers like NCO/N-rGO and 3 mg of activated carbon using 1 mL of isopropyl alcohol and 67  $\mu$ L of 5 wt.% Nafion ionomer for 30 min. Then, the catalyst ink was coated onto the GDL by using a brush coating method, with the total catalyst loading of 1 mg in GDL, and it was dried in a vacuum oven overnight at 80 °C. The discharge–charge cycle was performed in a constant current mode using a battery analyzer (BST8-3) by breathing open air environment in the cathode part at room temperature.

### Construction and characterization of lithium-oxygen battery

For testing the lithium-oxygen battery a CR2032 coin cells punched bottom case (316 SS-MTI-Korea) packed with a Whatman-GF/A glass microfiber separator saturated with the lithium bis(trifluoromethane) sulfonimide (LiTFSI) in tetraethylene glycol dimethyl ether (TEGDME) solvent sandwiched between a polished lithium disc anode (MTI Korea) and a catalyst-coated gas diffusion layer (GDL, area 2.54 cm<sup>2</sup>). The cathode catalyst slurry was prepared by mixing N-methyl-2-pyrrolidone (NMP) with prepared as-synthesized flower like NCO/N-rGO, electronic conducting super p carbon black (Daejung, Korea) and polyvinylidene fluoride (PVdF) binder in the weight ratio of 70:20:10 respectively. Then, the catalyst slurry was deposited over GDL by using a doctor blade technique, and it was dried in a vacuum oven overnight at 55 °C to obtain a composite cathode with an electrode mass of about 1 mg.cm<sup>-2</sup> loaded on Gas diffusion layer. The lithium-oxygen cell was then assembled in an Ar-filled dry glove box using a 2032 coin cell with openings at the cathodic part for allowing oxygen. The cells were galvanostatically cycled by a battery analyzer at room temperature between 4.5-2.0 V vs. Li<sup>+</sup>/Li at a current density of 200 mA.g<sup>-1</sup> by breathing pure oxygen at the rate of 1-atmosphere pressure. For charging and discharging the cut-off voltage was fixed with 2.0 V for discharging and 4.5 V charging vs. Li.

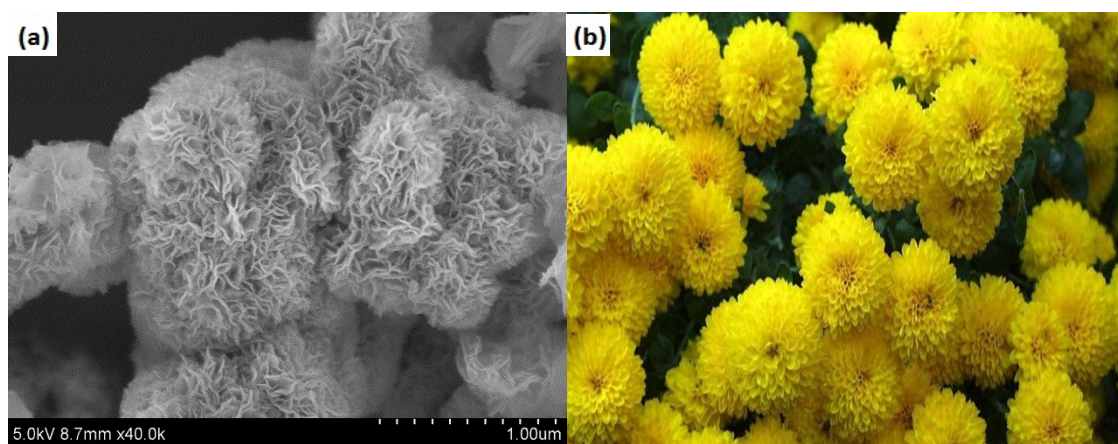

Fig. S1. (a) FE-SEM image of as-synthesized flower like NCO/N-rGO; (b) Photo image of Chrysanthemum flower.

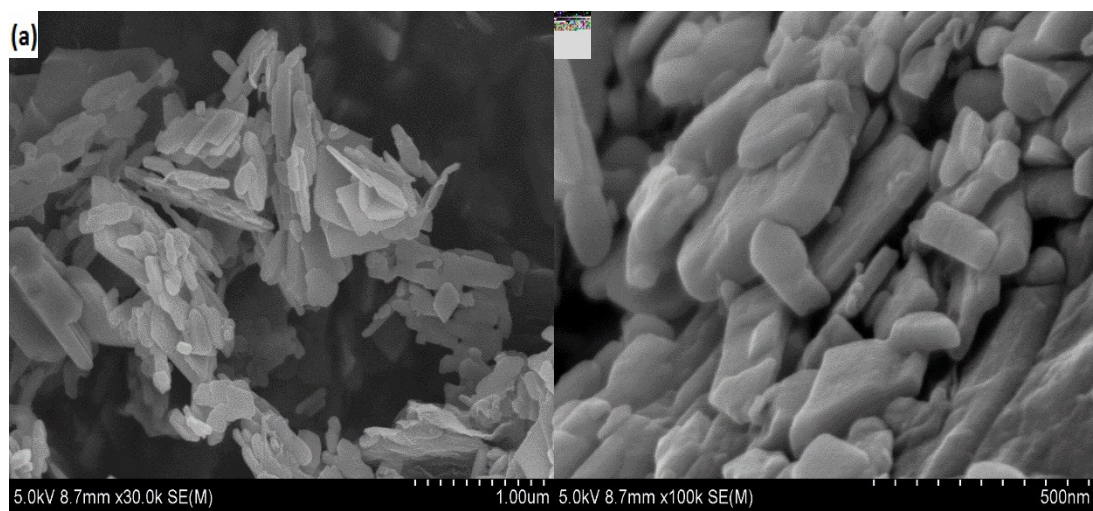

Fig. S2. FE-SEM images of as-synthesized bare NCO

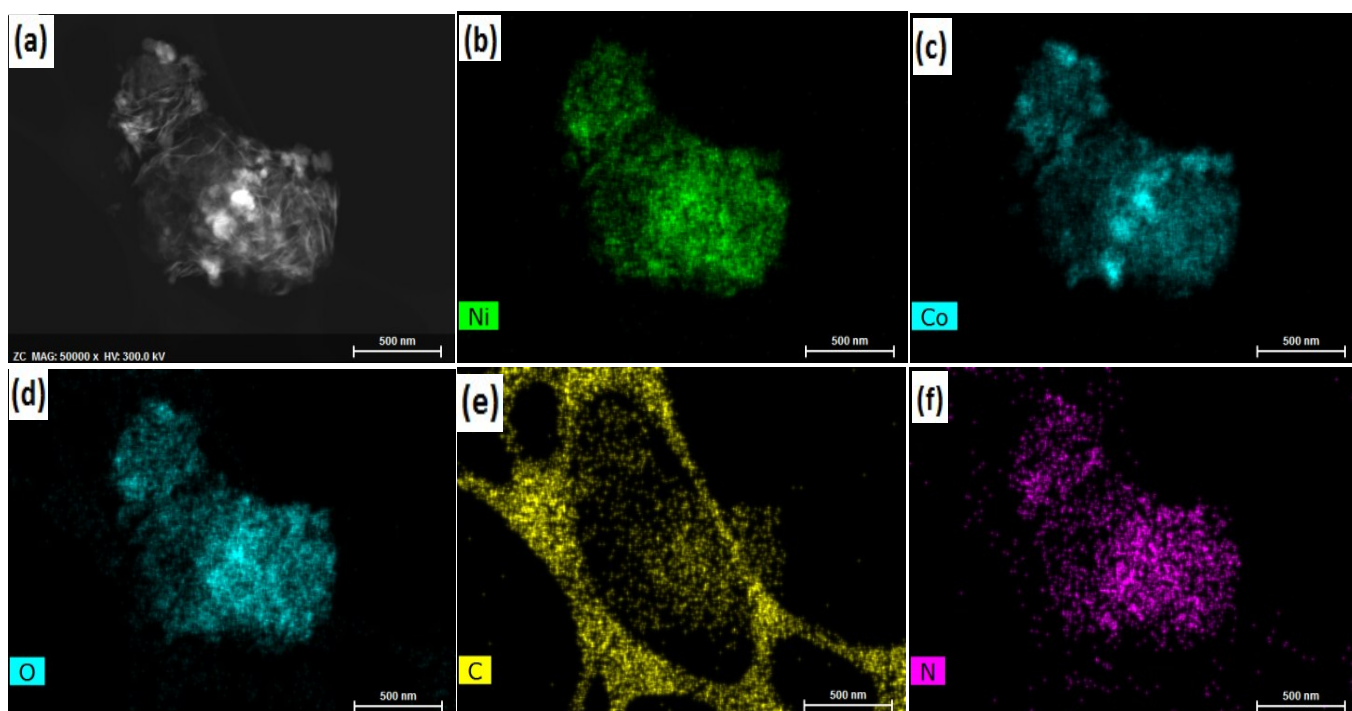

Fig. S3. (a) STEM image of flower like NCO/N-rGO, and the corresponding elemental maps of (b) Ni-K edge, (c) Co-K edge, (d) O-K edge, (e) C-K edge, and (f) N-K edge.

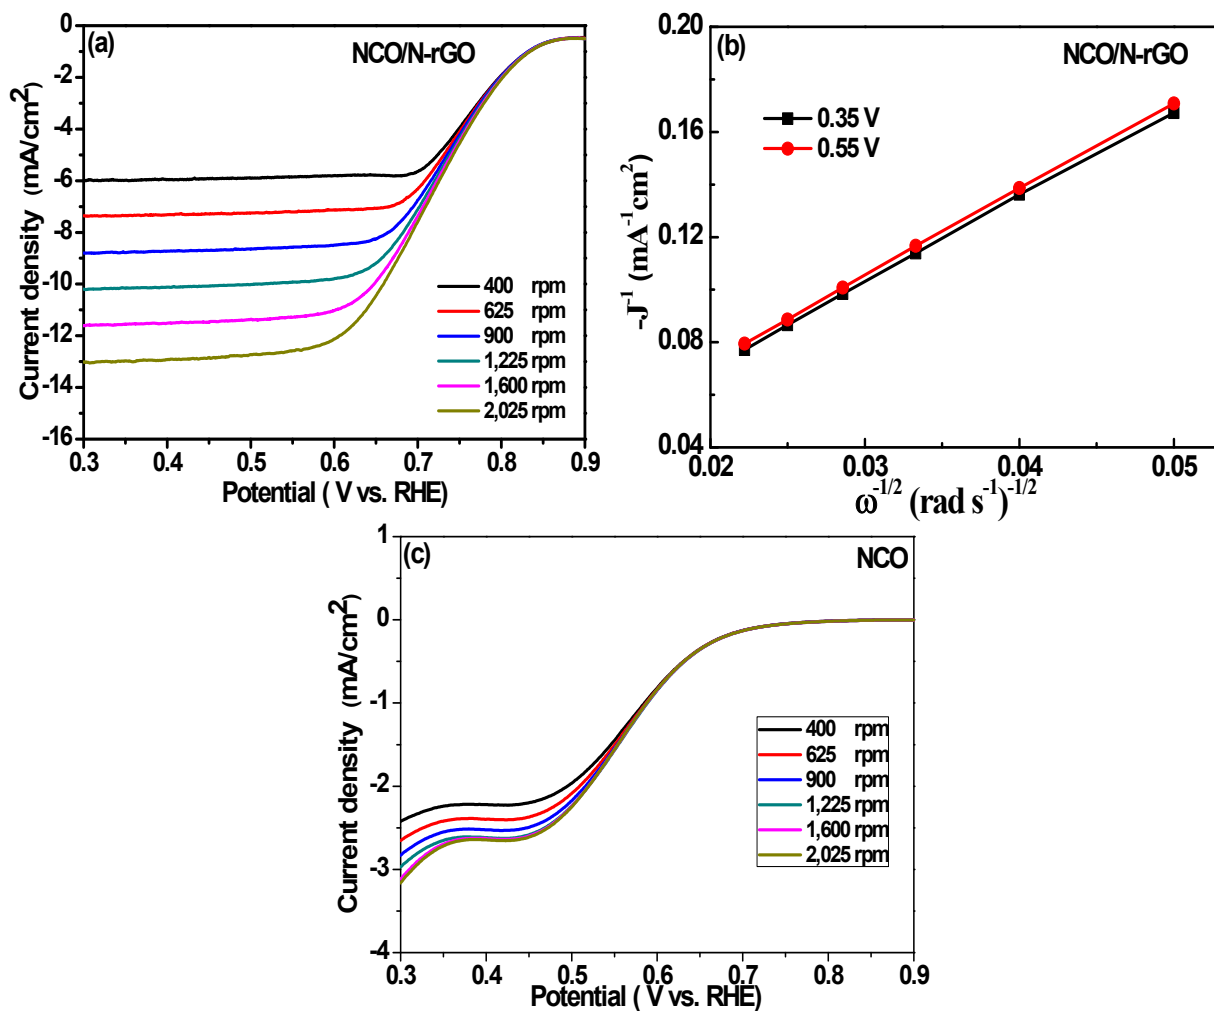

Fig. S4. (a) Oxygen reduction RDE polarization curves for flower like NCO/N-rGO; (b) and corresponding Koutecky–Levich plots at different potentials (0.35 and 0.55 V); (c) Oxygen reduction RDE polarization curves for bare NCO; Experiments were carried out at different rotation speeds (400–2025 rpm) in 0.1 M KOH at a scan rate of  $5 \text{ mV s}^{-1}$ .



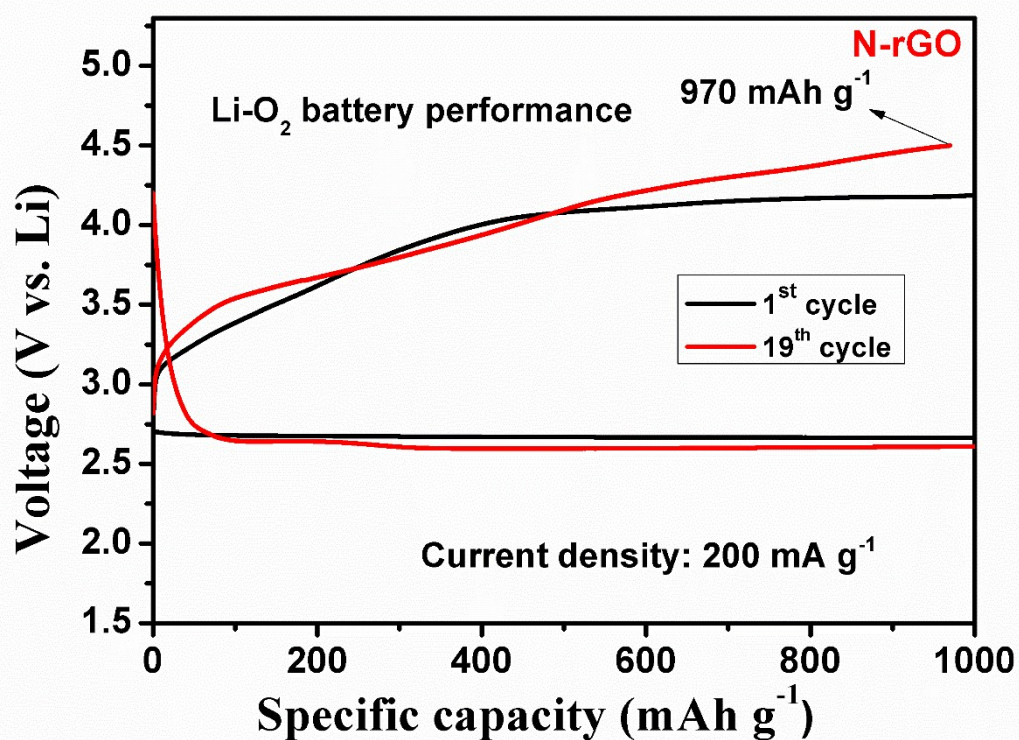

Fig.S5. Galvanostatic cycles of N-rGO with a controlled capacity of 1000 mAh g<sup>-1</sup> at a current density of 200 mA g<sup>-1</sup> to a cut-off voltage of 2.0 V (discharge) and 4.5 V (charge) vs. Li.



Table S1. Summary of charge and discharge (C-D) potential gap of flower like NCO/N-rGO cathode catalyst for zinc-air battery at different current densities calculated from Galvanodynamic discharge and charge curve.

| Current density<br>(A g <sup>-1</sup> ) | C-D voltage gap<br>(V vs. Zn) |
|-----------------------------------------|-------------------------------|
| 1                                       | 0.26                          |
| 10                                      | 0.70                          |
| 20                                      | 1.03                          |
| 30                                      | 1.30                          |
| 40                                      | 1.56                          |
| 50                                      | 1.68                          |
| 60                                      | 1.83                          |
| 70                                      | 2.00                          |

Table S2. Summary of charge and discharge potential gap of flower like NCO/N-rGO cathode catalyst for zinc-air and lithium-oxygen battery over 50 cycles calculated from Galvanostatic discharge and charge curve.

| Metal-air Battery            | 1 <sup>st</sup> cycle |                  |                   | 50 <sup>th</sup> cycle |                  |                   |
|------------------------------|-----------------------|------------------|-------------------|------------------------|------------------|-------------------|
|                              | Discharge potential   | Charge potential | C-D potential gap | Discharge potential    | Charge potential | C-D potential gap |
| Zinc-air<br>(V vs. Zn)       | 1.13                  | 1.83             | 0.70              | 1.07                   | 1.84             | 0.77              |
| Lithium-oxygen<br>(V vs. Li) | 2.63                  | 4.39             | 1.76              | 2.55                   | 4.45             | 1.90              |

## References

- (1) Hummers, W. S, Offeman, R. E. J. Am. Chem. Soc. 1958, 80, 1339–1339.
- (2) M. Prabu, P. Ramakrishnan and S. Shanmugam, Electrochem. Commun. 2014, 41, 59–63.
